# Supplementary material for: A Sustainable Banana Peel Activated Carbon for Removing Pharmaceutical Pollutants from Different Waters: Production, Characterization, and Application
Source: MDPI journal article supplement (doi:10.3390/ma17051032), 2024-02-23
Supplement: s1 [file s1]

# **A Sustainable Banana Peel Activated Carbon for Removing Pharmaceutical Pollutants from Different Waters: Production, Characterization, and Application <sup>†</sup>**

**Osamah J. Al-sareji <sup>1,2,\*</sup>, Ruqayah Ali Grmasha <sup>1,2,3</sup>, Mónika Meiczinger <sup>1</sup>, Raed A. Al-Juboori <sup>4,5,\*</sup>, Viola Somogyi <sup>1</sup> and Khalid S. Hashim <sup>6,7,8</sup>**

<sup>1</sup> Sustainability Solutions Research Lab, Faculty of Engineering, University of Pannonia, Egyetem str. 10, H-8200 Veszprém, Hungary; ruqayah.grmasha@unswalumni.com (R.A.G.); meiczinger.monika@mk.uni-pannon.hu (M.M.); somogyi.viola@mk.uni-pannon.hu (V.S.)

<sup>2</sup> Environmental Research and Studies Center, University of Babylon, Babylon, Al-Hillah 51001, Iraq

<sup>3</sup> Research Group of Limnology, Center for Natural Science, Faculty of Engineering, University of Pannonia, Egyetem u. 10, H-8200 Veszprém, Hungary

<sup>4</sup> NYUAD Water Research Center, New York University Abu Dhabi, Abu Dhabi 129188, United Arab Emirates

<sup>5</sup> Water and Environmental Engineering Research Group, Department of Built Environment, Aalto University, P.O. Box 15200, FI-00076 Espoo, Finland

<sup>6</sup> School of Civil Engineering and Built Environment, Liverpool John Moores University, Liverpool L3 2ET, UK; k.s.hashim@ljmu.ac.uk

<sup>7</sup> Department of Environmental Engineering, College of Engineering, University of Babylon, Babylon, Al-Hillah 51001, Iraq

<sup>8</sup> Civil Engineering Department, Dijlah University College, Baghdad 00964, Iraq

\* Correspondence: osamah.al-sareji@unswalumni.com (O.J.A.-s.); raed.al-juboori@aalto.fi (R.A.A.-J.)

<sup>†</sup> This research was part of a doctoral thesis for Osamah J. Al-sareji.

**Table S1**  $S_{\text{BET}}$  and pore structures of BP samples

| Samples    | $S_{\text{BET}}$ ( $\text{m}^2/\text{g}$ ) | $V_{\text{tot}}$ ( $\text{cm}^3/\text{g}$ ) | $V_{\text{mic}}$ ( $\text{cm}^3/\text{g}$ ) | $V_{\text{mes}}$ ( $\text{cm}^3/\text{g}$ ) |
|------------|--------------------------------------------|---------------------------------------------|---------------------------------------------|---------------------------------------------|
| BP raw     | 0.650                                      | 0.062                                       | 0.021                                       | 0.041                                       |
| BP @ 350°C | 685.75                                     | 0.142                                       | 0.044                                       | 0.098                                       |
| BP @ 450°C | 911.59                                     | 0.180                                       | 0.070                                       | 0.110                                       |
| BP @ 550°C | 508.62                                     | 0.136                                       | 0.029                                       | 0.107                                       |

**Table S2** Langmuir, Freundlich, Pseudo-1st-Order Model and Pseudo-2nd-Order Model parameter

| Langmuir               | $q_{\text{max}}$ ( $\text{mg/g}$ ) | $K_L$    | $R_L$    | $R^2$ |
|------------------------|------------------------------------|----------|----------|-------|
| AMO                    | 393.701                            | 0.037    | 0.349    | 0.999 |
| CBZ                    | 338.983                            | 0.058    | 0.257    | 0.991 |
| Freundlich             | $1/n$                              | $K_f$    | $R^2$    |       |
| AMO                    | 0.633                              | 21.877   | 0.982    |       |
| CBZ                    | 0.58                               | 28.840   | 0.777    |       |
| Pseudo-1st-Order Model | $q_e$ ( $\text{mg g}^{-1}$ )       | $K_1$    | $R^2$    |       |
| AMO                    | 54.81698                           | 1.46E-05 | 0.909    |       |
| CBZ                    | 73.92123                           | 1.18E-05 | 0.977    |       |
| Pseudo-2nd-Order Model | $q_e$ ( $\text{mg/g}$ )            | $q_e^2$  | $K_2$    | $R^2$ |
| AMO                    | 1.32E+02                           | 1.73E+04 | 1.20E-03 | 0.992 |
| CBZ                    | 1.28E+02                           | 1.64E+04 | 7.51E-04 | 0.984 |

**Table S3** Thermodynamic parameters of pollutants adsorption on BPAC

| Compound | Temperature (K) | $K_l$  | $\Delta G^\circ$ | $\Delta H^\circ$ | $\Delta S^\circ$ | $R^2$ |
|----------|-----------------|--------|------------------|------------------|------------------|-------|
| AMO      | 283             | 5.581  | -4.045           | 18.196           | 78.841           | 0.983 |
|          | 293             | 7.799  | -5.003           |                  |                  |       |
|          | 303             | 9.737  | -5.733           |                  |                  |       |
|          | 313             | 11.778 | -6.418           |                  |                  |       |
| CBZ      | 283             | 6.243  | -4.309           | 17.116           | 116.396          | 0.976 |
|          | 293             | 10.848 | -5.807           |                  |                  |       |
|          | 303             | 15.320 | -6.875           |                  |                  |       |
|          | 313             | 20.407 | -7.848           |                  |                  |       |
